# Supplementary material for: Increasing Research Productivity in Undergraduate Research Experiences: Exploring Predictors of Collaborative Faculty–Student Publications
Source: Atypon-hosted journal article supplement (doi:10.1187/cbe.16-11-0326), 2017-07-27
Supplement: combinedsupmats.pdf [file combinedsupmats.pdf]

# Supplemental Material

*CBE—Life Sciences Education*

Morales *et al.*

**Appendix Table 1. The Correlation Matrix (N = 468)**

|                                                      | 1       | 2       | 3       | 4       | 5       | 6       | 7      | 8       | 9       | 10      | 11      | 12     |
|------------------------------------------------------|---------|---------|---------|---------|---------|---------|--------|---------|---------|---------|---------|--------|
| <b>1. Faculty-student Collaborative Publications</b> | -       |         |         |         |         |         |        |         |         |         |         |        |
| <b>2. 1 Summer (or less)</b>                         | -.209** | -       |         |         |         |         |        |         |         |         |         |        |
| <b>3. 1 Year</b>                                     | -.145** | -.452** | -       |         |         |         |        |         |         |         |         |        |
| <b>4. More than 1 Year</b>                           | .377**  | -.369** | -.614** | -       |         |         |        |         |         |         |         |        |
| <b>5. Number of Undergraduates</b>                   | .531**  | -.272** | -.034   | .320**  | -       |         |        |         |         |         |         |        |
| <b>6. Number of Graduate Students</b>                | .328**  | -.074   | -.015   | .107*   | .392**  | -       |        |         |         |         |         |        |
| <b>7. Formal Program</b>                             | .180**  | .022    | -.117*  | .146**  | .261**  | .067    | -      |         |         |         |         |        |
| <b>8. Mentoring Barriers: Time-consuming</b>         | -.012   | .050    | -.043   | .003    | .035    | .056    | -.012  | -       |         |         |         |        |
| <b>9. Mentoring Barriers: Low Quality</b>            | -.090   | .064    | .148**  | -.202** | -.116*  | -.054   | -.059  | .376**  | -       |         |         |        |
| <b>10. Mentoring Benefits: Teaching Research</b>     | .249**  | -.152** | -.067   | .206**  | .267**  | .142**  | .066   | .045    | -.254** | -       |         |        |
| <b>11. Mentoring Benefits: Receiving Help</b>        | .139**  | -.215** | .051    | .153**  | .156**  | -.031   | .009   | -.133** | -.323** | .242**  | -       |        |
| <b>12. Native American undergraduates</b>            | .215**  | -.171** | -.038   | .210**  | .225**  | .153**  | .143** | .071    | .005    | .064    | .114*   | -      |
| <b>13. Hispanic undergraduates</b>                   | .198**  | -.139** | -.029   | .173**  | .330**  | .148**  | .267** | -.002   | -.095*  | .236**  | .108*   | .202** |
| <b>14. Black Undergraduates</b>                      | .299**  | .085    | -.118*  | .065    | .281**  | .204**  | .252** | .004    | -.003   | .100*   | .051    | .251** |
| <b>15. Female Undergraduates</b>                     | .186**  | -.099*  | -.029   | .163**  | .353**  | .193**  | .192** | .057    | -.007   | .133**  | .100*   | .149** |
| <b>16. LGBT Undergraduates</b>                       | .176**  | -.122** | -.023   | .142**  | .272**  | .114*   | .091   | .090    | -.087   | .171**  | .101*   | .190** |
| <b>17. Disabled Undergraduates</b>                   | .215**  | -.082   | .001    | .073    | .191**  | .189**  | .101*  | .001    | -.083   | .119*   | .086    | .202** |
| <b>18. Sex</b>                                       | -.078   | -.030   | .025    | -.049   | -.076   | -.079   | -.005  | .144**  | .006    | .083    | -.010   | .042   |
| <b>19. Hispanic</b>                                  | -.030   | -.143** | .027    | .082    | .021    | .018    | .019   | -.004   | -.103*  | .131**  | .040    | .076   |
| <b>20. White</b>                                     | .092*   | .063    | .000    | -.037   | .112*   | .124**  | -.015  | .049    | .050    | .029    | -.021   | -.020  |
| <b>21. Asian</b>                                     | -.100*  | .046    | .023    | -.058   | -.160** | -.138** | -.061  | -.063   | -.005   | -.128** | .010    | -.083  |
| <b>22. Other Race/Ethnicity</b>                      | .008    | .103*   | -.092*  | .017    | -.025   | -.117*  | .059   | -.014   | .015    | -.039   | .001    | .014   |
| <b>23. H Index Score</b>                             | .257**  | .226**  | -.176** | .011    | .085    | .300**  | .064   | -.114*  | .013    | -.128** | -.148** | -.031  |
| <b>24. Years in HE</b>                               | .284**  | .071    | -.086   | .042    | .158**  | .390**  | .051   | -.019   | .018    | -.011   | -.148** | .137** |

|                 |       |        |         |         |         |       |      |      |      |       |       |        |
|-----------------|-------|--------|---------|---------|---------|-------|------|------|------|-------|-------|--------|
| 25. NIH Funding | -.003 | .323** | -.125** | -.137** | -.140** | -.050 | .066 | .065 | .041 | -.019 | -.081 | -.100* |
|-----------------|-------|--------|---------|---------|---------|-------|------|------|------|-------|-------|--------|

\*\* p<0.001, \* p<0.05

Appendix Table 1. The Correlation Matrix (N = 468) (Con.)

|                             | 13      | 14      | 15     | 16      | 17     | 18      | 19      | 20      | 21      | 22    | 23     | 24    | 25 |
|-----------------------------|---------|---------|--------|---------|--------|---------|---------|---------|---------|-------|--------|-------|----|
| 13. Hispanic Undergraduates | -       |         |        |         |        |         |         |         |         |       |        |       |    |
| 14. Black Undergraduates    | .188**  | -       |        |         |        |         |         |         |         |       |        |       |    |
| 15. Female Undergraduates   | .276**  | .198**  | -      |         |        |         |         |         |         |       |        |       |    |
| 16. LGBT Undergraduates     | .171**  | .266**  | .195** | -       |        |         |         |         |         |       |        |       |    |
| 17. Disabled Undergraduates | .173**  | .182**  | .167** | .390**  | -      |         |         |         |         |       |        |       |    |
| 18. Sex                     | .098*   | .032    | .127** | .179**  | .078   | -       |         |         |         |       |        |       |    |
| 19. Hispanic                | .193**  | -.118*  | -.002  | .075    | .088   | .023    | -       |         |         |       |        |       |    |
| 20. White                   | -.051   | .149**  | .035   | .043    | .004   | .019    | -.669** | -       |         |       |        |       |    |
| 21. Asian                   | -.167** | -.129** | .006   | -.148** | -.095* | -.058   | -.198** | -.444** | -       |       |        |       |    |
| 22. Other Race/Ethnicity    | .056    | .058    | -.061  | -.027   | -.066  | .007    | -.096*  | -.241** | -.073   | -     |        |       |    |
| 23. H Index Score           | -.113*  | .127**  | .055   | -.101*  | .013   | -.155** | -.157** | .193**  | -.065   | -.082 | -      |       |    |
| 24. Years in HE             | .152**  | .198**  | .139** | .076    | .147** | -.051   | -.032   | .176**  | -.209** | -.046 | .475** | -     |    |
| 25. NIH Funding             | -.044   | .003    | -.063  | -.084   | -.055  | -.077   | -.036   | .031    | .036    | .004  | .157** | -.032 | -  |

\*\* p<0.001, \* p<0.05
